# Supplementary material for: Combined SNPs sequencing and allele specific proteomics capture reveal functional causality underpinning the 2p25 prostate cancer susceptibility locus
Source: Research Square preprint supplement (doi:10.21203/rs.3.rs-3943095/v1), 2024-04-04
Supplement: Supplementary file 1 [file aaea51b65058b290bdac1b12.xlsx]

## Sheet: Sheet1
Supplementary Data 1
Analysis of eQTL across rs4519489 locus using CPGEA cohort. P values were evaluated with linear regression. P values are two-sided and adjusted by false discovery rate.
SNP	gene	beta	t-stat	p-value	FDR
rs4519489_A	NOL10	0.430324	3.53527	0.000563685	0.0152195
rs4519489_A	E2F6	0.352753	2.87902	0.0046606	0.0629182
rs4519489_A	RRM2	0.271052	2.15508	0.0329841	0.253742
rs4519489_A	TAF1B	0.258875	2.10062	0.0375915	0.253742
rs4519489_A	AIDAP1	0.240046	1.90535	0.0589257	0.318199
rs4519489_A	ROCK2	0.197694	1.52665	0.129258	0.58166
rs4519489_A	RP11-95D17.1	0.138284	1.09779	0.27431	0.761565
rs4519489_A	YWHAQ	0.128358	1.00432	0.317078	0.761565
rs4519489_A	KCNF1	-0.115736	-0.904916	0.367171	0.761565
rs4519489_A	ODC1	-0.108208	-0.903688	0.36782	0.761565
rs4519489_A	RN7SL832P	-0.107609	-0.865583	0.388302	0.761565
rs4519489_A	ATP6V1C2	0.0963826	0.794201	0.428515	0.761565
rs4519489_A	GRHL1	0.0957463	0.786436	0.433032	0.761565
rs4519489_A	KLF11	0.0954147	0.778288	0.437802	0.761565
rs4519489_A	CYS1	-0.0989941	-0.778185	0.437863	0.761565
rs4519489_A	RP11-254F7.3	0.0926338	0.755513	0.451298	0.761565
rs4519489_A	RNU2-13P	0.0860603	0.685868	0.494008	0.778036
rs4519489_A	RN7SL674P	0.0777398	0.621173	0.535565	0.778036
rs4519489_A	C2orf50	0.0749322	0.603067	0.547507	0.778036
rs4519489_A	RP11-83M8.1	0.0689653	0.533061	0.594895	0.803108
rs4519489_A	RP11-254F7.2	0.0597149	0.47885	0.632844	0.809627
rs4519489_A	ODC1-DT	-0.0480934	-0.37861	0.70559	0.809627
rs4519489_A	GREB1	0.0457389	0.367055	0.71417	0.809627
rs4519489_A	SNORA80B	-0.0400765	-0.333052	0.739627	0.809627
rs4519489_A	HPCAL1	0.0399996	0.319766	0.749655	0.809627
rs4519489_A	SLC66A3	0.0228803	0.177586	0.859322	0.892373
rs4519489_A	PDIA6	0.00573272	0.0455732	0.96372	0.96372
