# Supplementary material for: Combined SNPs sequencing and allele specific proteomics capture reveal functional causality underpinning the 2p25 prostate cancer susceptibility locus
Source: Research Square preprint supplement (doi:10.21203/rs.3.rs-3943095/v1), 2024-04-04
Supplement: Supplementary file 2 [file b5244f8c280f20eb82325708.xlsx]

## Sheet: Sheet1
Supplementary Data 2
RNA-seq analysis of differentially expressed genes (DEGs) in PC3 cells upon knockdown of NOL10.
Gene Name	baseMean	log2FoldChange	lfcSE	stat	pvalue	padj
FLNC	8954.31	1.6092	0.0760596	21.157	2.37743e-99	3.86428e-95
LINC01547	4344.25	-2.3009	0.115162	-19.9798	8.25787e-89	6.71117e-85
DLGAP1-AS2	1873.51	1.99909	0.101377	19.7194	1.469e-86	7.95903e-83
BHLHE41	4388.69	-1.65579	0.0886262	-18.6829	6.82687e-78	2.7741e-74
GADD45A	2637.55	1.74834	0.0991774	17.6284	1.49158e-69	4.84884e-66
NOL10	320.792	-4.91347	0.28159	-17.449	3.50251e-68	9.48829e-65
STC2	32596.3	1.25991	0.0742998	16.9572	1.70408e-64	3.95688e-61
CLDN1	2474.29	1.68956	0.100304	16.8444	1.15356e-63	2.34375e-60
ANKRD1	1838.6	1.67418	0.101462	16.5006	3.62975e-61	6.55532e-58
MCAM	5326.7	1.32915	0.0829719	16.0193	9.37625e-58	1.52402e-54
ANGPTL4	955.724	1.95324	0.124329	15.7102	1.28696e-55	1.90166e-52
DYSF	5091.3	1.22312	0.0797472	15.3374	4.29767e-53	5.37341e-50
LL21NC02-1C16.2	1377.53	-2.11105	0.137615	-15.3402	4.11659e-53	5.37341e-50
DUSP1	2803	1.71321	0.113075	15.1511	7.44901e-52	8.6483e-49
IL4I1	1801.11	1.53799	0.10156	15.1436	8.35305e-52	9.05137e-49
TNC	1204.09	-1.69349	0.112724	-15.0233	5.16864e-51	5.25069e-48
CD46	3910.67	-1.28193	0.0853819	-15.014	5.94219e-51	5.68143e-48
DCBLD1	1341.21	-1.70461	0.117815	-14.4685	1.91525e-47	1.72947e-44
OAS3	3377.76	-1.37124	0.0948397	-14.4585	2.21705e-47	1.89663e-44
SIRPB2	1936.45	-1.62746	0.112892	-14.4161	4.09665e-47	3.32934e-44
SOD2	3909.34	-1.20031	0.0842522	-14.2467	4.70134e-46	3.63883e-43
NCF2	1455.95	1.83072	0.129253	14.1639	1.53317e-45	1.13274e-42
SERPINE1	884.713	1.82636	0.130135	14.0344	9.59939e-45	6.78385e-42
S100A9	17738	-1.41314	0.101281	-13.9526	3.0332e-44	2.05423e-41
ASB1	2607.17	1.27186	0.0919382	13.8339	1.59115e-43	1.0345e-40
DDIT4	11265.4	1.16072	0.0843724	13.7571	4.61404e-43	2.88448e-40
IL24	1693.07	1.408	0.103103	13.6562	1.85298e-42	1.11549e-39
SERPINH1	5001.84	1.16612	0.085956	13.5665	6.32677e-42	3.67269e-39
HSPB1	19833.9	1.02112	0.0753344	13.5545	7.45252e-42	4.17701e-39
TRIB2	558.545	-2.15114	0.160417	-13.4097	5.30783e-41	2.78302e-38
DESI2	1435.42	1.44256	0.109555	13.1674	1.35096e-39	6.86202e-37
PGF	993.749	1.65611	0.126296	13.1129	2.77713e-39	1.36786e-36
IFI44	2394.1	-1.29236	0.098901	-13.0672	5.07142e-39	2.42444e-36
KNTC1	1407.28	-1.52879	0.117897	-12.9672	1.87724e-38	8.71792e-36
SPHK1	1035.89	1.51984	0.117991	12.8809	5.76308e-38	2.60203e-35
HSPA8	9000.08	1.0011	0.0777597	12.8743	6.27836e-38	2.75807e-35
GALNT2	2185.88	-1.36547	0.106356	-12.8387	9.95011e-38	4.25603e-35
FAM20C	774.801	-1.88112	0.147128	-12.7856	1.97283e-37	8.22215e-35
PSAT1	1021.16	1.63045	0.12849	12.6893	6.78104e-37	2.75547e-34
PARP9	2152.39	-1.37148	0.108813	-12.604	2.00781e-36	7.95974e-34
IFI44L	3264.98	-1.28339	0.102078	-12.5727	2.98375e-36	1.15471e-33
GBP1	1338.99	-1.46946	0.11788	-12.4657	1.14806e-35	4.24104e-33
SQSTM1	6699	1.27239	0.102448	12.4198	2.0397e-35	7.36741e-33
GBP2	649.49	-1.76861	0.143224	-12.3486	4.95855e-35	1.75209e-32
BAG3	2387.31	1.5293	0.124161	12.3171	7.33105e-35	2.5353e-32
SLC3A2	16778.9	1.19258	0.0971042	12.2815	1.13932e-34	3.85803e-32
NIBAN1	853.758	2.00378	0.164428	12.1864	3.67351e-34	1.21856e-31
UPP1	7081.86	1.03951	0.0853845	12.1745	4.24937e-34	1.38138e-31
IDH1	2569.4	1.51705	0.125499	12.0881	1.22044e-33	3.8896e-31
GCLM	1936.98	1.59271	0.132538	12.0171	2.89037e-33	9.03463e-31
PRSS22	1929.14	1.1769	0.0981917	11.9857	4.22099e-33	1.27052e-30
DUSP5	3026.51	1.03581	0.0873017	11.8647	1.80542e-32	5.3355e-30
ITGB2	1386.15	-1.52117	0.128745	-11.8153	3.25259e-32	9.44065e-30
CXCL5	3436.19	1.06901	0.0905606	11.8044	3.70629e-32	1.05688e-29
TYMP	1706.23	-1.16027	0.0999677	-11.6065	3.82071e-31	1.05257e-28
ATAD2	1402.93	-1.30105	0.112487	-11.5663	6.1082e-31	1.65471e-28
AP5Z1	3844.16	1.1288	0.0991535	11.3844	5.00294e-30	1.25104e-27
B4GALT5	2480.18	-1.16866	0.102631	-11.387	4.85653e-30	1.25104e-27
ITGB6	836.801	-1.47517	0.129576	-11.3846	4.98792e-30	1.25104e-27
PRKD3	2216.37	-1.0727	0.0946088	-11.3382	8.48385e-30	2.02789e-27
MAP1B	1160.59	1.31897	0.116591	11.3128	1.1339e-29	2.67108e-27
MUC5B	188.434	-3.06606	0.273644	-11.2045	3.87376e-29	8.86817e-27
FOXD1	616.859	1.70249	0.152078	11.1949	4.32095e-29	9.75455e-27
STAT1	2885.68	-1.06338	0.0955395	-11.1302	8.94229e-29	1.99107e-26
MAP2	572.846	1.65729	0.150434	11.0167	3.17526e-28	6.97441e-26
POLD3	867.332	-1.412	0.12871	-10.9704	5.30343e-28	1.14936e-25
FANCA	1035.51	-1.29515	0.119128	-10.8719	1.56826e-27	3.35401e-25
PLAT	1165.33	1.28511	0.118979	10.8012	3.39829e-27	7.0815e-25
ZNF469	440.756	2.10221	0.196489	10.6989	1.03033e-26	2.09337e-24
MIR100HG	1502.03	-1.10412	0.103598	-10.6578	1.60371e-26	3.14057e-24
EPGN	2387.8	1.07172	0.102886	10.4166	2.08252e-25	3.93597e-23
RP11-818F20.5	197.161	2.66671	0.256136	10.4113	2.202e-25	4.11394e-23
AREG	2698.19	1.03356	0.0998201	10.3542	4.00474e-25	7.39693e-23
OSGIN1	994.596	1.43428	0.139779	10.2611	1.05513e-24	1.88462e-22
SLC1A4	365.186	1.91214	0.187152	10.217	1.66328e-24	2.90699e-22
KIF18B	640.663	-1.56038	0.152836	-10.2095	1.79745e-24	3.10805e-22
PPP1R15A	6263.12	1.10614	0.108626	10.183	2.3612e-24	4.03989e-22
DYNLL1	2015.72	1.05633	0.104068	10.1504	3.29982e-24	5.58701e-22
BEX2	860.995	1.38893	0.137264	10.1186	4.56814e-24	7.65469e-22
CLU	793.018	1.31886	0.130469	10.1086	5.06272e-24	8.39688e-22
SLC1A5	2946.02	1.08945	0.108276	10.0618	8.15104e-24	1.33825e-21
AKNA	642.02	1.50593	0.150455	10.0092	1.38893e-23	2.25757e-21
EPDR1	1195.5	1.15869	0.115908	9.99665	1.57638e-23	2.53688e-21
TRNP1	1135.95	1.14891	0.114991	9.99135	1.66307e-23	2.65015e-21
RPLP0P2	262.485	2.12667	0.212979	9.98539	1.76599e-23	2.78684e-21
PRR5L	743.469	-1.43314	0.144267	-9.93392	2.96361e-23	4.54439e-21
IL20RB	205.848	2.35828	0.244006	9.66484	4.25284e-22	6.28415e-20
CDK1	1897.38	-1.03975	0.107894	-9.63677	5.59212e-22	8.18868e-20
NRIP1	1257.17	-1.07633	0.111888	-9.61969	6.60305e-22	9.58268e-20
SMC4	1116.11	-1.113	0.116389	-9.56278	1.14635e-21	1.60627e-19
RRM2	1232.5	-1.10021	0.115207	-9.54987	1.29857e-21	1.80401e-19
CBARP	658.341	1.32362	0.138848	9.53283	1.53057e-21	2.10829e-19
PLEK2	1362	1.11284	0.117096	9.50366	2.02633e-21	2.72198e-19
PCDH1	1550.67	1.0207	0.108505	9.40699	5.10538e-21	6.63863e-19
ZGRF1	493.467	-1.46714	0.157379	-9.32235	1.13786e-20	1.44491e-18
TMEM45A	622.064	1.41204	0.15208	9.28487	1.61899e-20	2.00879e-18
FUT3	1279.56	1.03595	0.111621	9.28097	1.67942e-20	2.06797e-18
MCM4	913.515	-1.15081	0.12486	-9.2168	3.06093e-20	3.68536e-18
FAM43A	416.018	1.53603	0.167631	9.16316	5.0401e-20	6.02366e-18
ZFAND2A	1820.66	1.02407	0.111784	9.16114	5.13543e-20	6.09279e-18
GDF15	15579.5	2.49787	0.274366	9.10414	8.69502e-20	1.02412e-17
WDHD1	845.257	-1.17749	0.129651	-9.08205	1.06544e-19	1.24588e-17
BICC1	476.154	-1.4842	0.163597	-9.07225	1.1658e-19	1.35349e-17
SDC1	1259.04	1.10448	0.122811	8.99333	2.3984e-19	2.7072e-17
TRIM58	1073.38	1.03608	0.115489	8.97124	2.93182e-19	3.26396e-17
MMP13	1006.49	1.11232	0.124403	8.94123	3.84873e-19	4.22684e-17
SLC31A1	1101.03	1.18566	0.132896	8.92169	4.59238e-19	4.9763e-17
ATAD5	301.814	-1.72267	0.194313	-8.86542	7.62139e-19	8.0966e-17
CXCL10	235.706	-1.96284	0.221617	-8.85692	8.22558e-19	8.62571e-17
NOX5	848.613	-1.26921	0.145067	-8.74911	2.15043e-18	2.171e-16
SIRPB1	796.329	-1.33527	0.15307	-8.72324	2.70349e-18	2.69586e-16
RP5-1074L1.4	377.754	-1.59877	0.183656	-8.70525	3.16882e-18	3.12157e-16
LURAP1L	1050.64	1.1534	0.133294	8.65307	5.01304e-18	4.82141e-16
PDE2A	301.396	1.67595	0.194397	8.62128	6.62072e-18	6.29317e-16
SLC1A6	319.187	-1.65692	0.192245	-8.61882	6.76499e-18	6.39292e-16
TRIM14	806.646	-1.10205	0.129552	-8.50661	1.79092e-17	1.63537e-15
MED13L	1402.89	-1.00172	0.11783	-8.50133	1.87424e-17	1.7019e-15
PTX3	743.381	1.30302	0.154359	8.4415	3.13289e-17	2.7675e-15
DNAJA4	337.363	1.94715	0.230803	8.43641	3.27236e-17	2.85962e-15
LINC02015	191.193	-2.2001	0.262133	-8.39308	4.73571e-17	4.05127e-15
CIT	863.299	-1.12899	0.134699	-8.38161	5.22095e-17	4.443e-15
FANCD2	775.852	-1.10219	0.132233	-8.33524	7.73433e-17	6.54759e-15
CSF3	176.762	-2.16907	0.260424	-8.32901	8.15231e-17	6.86568e-15
FANCI	803.005	-1.12409	0.135096	-8.32065	8.74789e-17	7.2917e-15
CACYBP	1287.54	1.02683	0.123931	8.28546	1.17654e-16	9.70739e-15
SLC7A11	1398.45	1.15349	0.139486	8.26962	1.34389e-16	1.10321e-14
DLGAP5	717.34	-1.09851	0.132987	-8.26029	1.45319e-16	1.18101e-14
BRIP1	877.151	-1.16306	0.141375	-8.22677	1.92321e-16	1.55522e-14
CMPK2	492.144	-1.41116	0.171659	-8.22072	2.02279e-16	1.62765e-14
PECAM1	381.115	-1.84714	0.225492	-8.19162	2.57731e-16	2.03357e-14
S1PR1	145.905	2.38944	0.291685	8.19185	2.5724e-16	2.03357e-14
CASP14	1855.5	-2.94693	0.359991	-8.18613	2.69768e-16	2.11826e-14
MRC2	623.682	1.16674	0.14259	8.18249	2.78042e-16	2.16234e-14
NQO2	671.364	1.14474	0.140288	8.15989	3.35324e-16	2.59541e-14
CCN3	238.17	1.79691	0.222993	8.05815	7.74562e-16	5.85569e-14
MREG	895.023	-1.10673	0.137608	-8.04266	8.79068e-16	6.5845e-14
SLC2A3	159.4	2.36058	0.293992	8.02941	9.79421e-16	7.30252e-14
RNF223	954.631	1.03226	0.128629	8.02513	1.01417e-15	7.52709e-14
IFT172	782.201	-1.12365	0.140072	-8.02192	1.04104e-15	7.69137e-14
TTF2	732.63	-1.0864	0.135484	-8.01865	1.06914e-15	7.86322e-14
SKP1	1181.09	-1.03363	0.129302	-7.99392	1.30712e-15	9.57027e-14
C21orf58	496.875	-1.25033	0.156514	-7.98862	1.3646e-15	9.9463e-14
ASIC3	859.387	-1.00196	0.126034	-7.94995	1.86585e-15	1.33602e-13
KRT15	832.558	1.0001	0.126247	7.92183	2.34032e-15	1.66112e-13
NEURL1	253.12	1.69542	0.214604	7.90025	2.78352e-15	1.95859e-13
LINC02693	805.329	1.21892	0.154927	7.86773	3.61139e-15	2.48727e-13
DSN1	790.046	-1.05615	0.134339	-7.86185	3.78488e-15	2.59575e-13
STK32A	418.199	1.3577	0.172734	7.86002	3.84058e-15	2.61191e-13
GBP4	562.817	-1.16302	0.148467	-7.83355	4.74281e-15	3.18552e-13
ECT2	755.165	-1.02782	0.131278	-7.82937	4.9031e-15	3.27963e-13
PLIN2	1297.9	1.06624	0.136548	7.80856	5.78447e-15	3.83758e-13
CHORDC1	623.805	1.13881	0.14656	7.77024	7.83394e-15	5.15518e-13
ROS1	380.164	-1.37307	0.1788	-7.67937	1.59872e-14	1.0072e-12
DOCK10	212.034	1.76019	0.231977	7.58778	3.25434e-14	2.00364e-12
HMOX1	9604.71	2.98511	0.394351	7.56968	3.74147e-14	2.28623e-12
POLQ	451.017	-1.2091	0.160031	-7.55538	4.17631e-14	2.51414e-12
MARCHF4	206.28	1.8078	0.239441	7.5501	4.34924e-14	2.60858e-12
CFDP1	450.111	1.2674	0.169128	7.4937	6.69579e-14	3.91487e-12
LINC02310	86.8158	2.91964	0.389878	7.48859	6.96156e-14	4.04119e-12
XRCC2	442.655	-1.21485	0.162769	-7.46365	8.4156e-14	4.81645e-12
SAMD9L	375.686	-1.40103	0.187806	-7.46001	8.65128e-14	4.93396e-12
VNN1	550.124	-1.09886	0.1481	-7.41976	1.17337e-13	6.55395e-12
C1QL4	462.035	1.17593	0.159139	7.38937	1.47526e-13	8.12841e-12
ACSS1	420.974	1.32036	0.179334	7.3626	1.80365e-13	9.83774e-12
CSGALNACT2	352.993	1.36612	0.187893	7.27073	3.57551e-13	1.89753e-11
ITGB8	691.526	-1.02415	0.141752	-7.22494	5.01337e-13	2.62017e-11
RBM24	257.765	1.50832	0.209462	7.20092	5.98067e-13	3.10575e-11
MSRB3	327.776	1.32983	0.185291	7.17701	7.12525e-13	3.64194e-11
MSX1	321.905	1.36961	0.19147	7.15317	8.47987e-13	4.26845e-11
OXTR	404.501	1.22776	0.172154	7.1318	9.9065e-13	4.93927e-11
METRNL	235.625	1.53923	0.217509	7.07662	1.47713e-12	7.14563e-11
SYNE1	323.525	1.30535	0.185061	7.05362	1.74327e-12	8.33384e-11
DTL	375.98	-1.28424	0.182245	-7.04678	1.83101e-12	8.70213e-11
KIF5C	593.659	1.0064	0.143255	7.02524	2.13697e-12	1.01266e-10
KIAA0040	283.185	1.39804	0.199111	7.02141	2.19644e-12	1.03782e-10
BAIAP2	628.733	1.14092	0.162591	7.0171	2.26528e-12	1.06724e-10
SYNGR3	401.36	1.27615	0.181925	7.01471	2.30423e-12	1.08245e-10
TUBB2B	205.075	1.62765	0.232066	7.01372	2.32064e-12	1.08702e-10
SNTB1	162.835	1.97982	0.283063	6.99428	2.66616e-12	1.24528e-10
LYPLAL1-DT	622.447	1.01171	0.144783	6.98781	2.79201e-12	1.29777e-10
CEP55	260.886	-1.44103	0.206923	-6.96411	3.30494e-12	1.52177e-10
CDK15	258.956	1.44412	0.207702	6.95285	3.57975e-12	1.63902e-10
XAF1	338.621	-1.35227	0.195878	-6.90365	5.06834e-12	2.28835e-10
CEP152	477.445	-1.0756	0.156552	-6.87053	6.39624e-12	2.85617e-10
NMRAL2P	217.91	1.56563	0.228146	6.8624	6.77145e-12	2.99084e-10
CENPI	245.456	-1.43496	0.210613	-6.81327	9.54064e-12	4.14635e-10
FBXO30	566.873	1.03677	0.152313	6.80685	9.97592e-12	4.31246e-10
RAB5IF	353.412	1.24746	0.183352	6.80363	1.02015e-11	4.39829e-10
SPX	136.084	2.00272	0.294419	6.80228	1.02976e-11	4.4163e-10
GEN1	425.695	-1.18094	0.175483	-6.72967	1.70051e-11	7.12372e-10
RAD51AP1	320.263	-1.25811	0.187873	-6.69661	2.13312e-11	8.82232e-10
NUF2	285.09	-1.3716	0.20521	-6.68386	2.32736e-11	9.57693e-10
MIR3142HG	582.233	-1.05772	0.158326	-6.68066	2.37862e-11	9.76316e-10
COL12A1	329.456	-1.22792	0.184448	-6.65729	2.78927e-11	1.13626e-09
MERTK	150.932	1.8108	0.271993	6.65752	2.78486e-11	1.13626e-09
NCAPG	251.955	-1.4025	0.210732	-6.65537	2.82592e-11	1.14831e-09
RP11-677M24.1	198.91	-1.52556	0.231895	-6.57865	4.74737e-11	1.85045e-09
SLC43A1	502.42	1.03488	0.158842	6.51515	7.2618e-11	2.76425e-09
AKR1B10	232.464	-1.39533	0.214718	-6.49843	8.11646e-11	3.06802e-09
CDCA7	370.21	-1.16964	0.181742	-6.43571	1.22897e-10	4.56068e-09
MAP6	115.795	2.07201	0.323261	6.40972	1.45783e-10	5.32484e-09
CCDC15	220.939	-1.41184	0.220641	-6.39879	1.56612e-10	5.68208e-09
CKAP2L	286.488	-1.2873	0.202467	-6.35808	2.04287e-10	7.26581e-09
CFAP69	183.442	-1.58117	0.250473	-6.31274	2.74133e-10	9.56172e-09
S100A8	983.622	-2.64493	0.419913	-6.29876	3.0004e-10	1.03105e-08
SLC5A1	96.6002	2.2063	0.35026	6.29904	2.99497e-10	1.03105e-08
CCDC150	266.197	-1.28898	0.204889	-6.29109	3.15242e-10	1.07873e-08
DNA2	366.723	-1.14563	0.182256	-6.28582	3.26124e-10	1.10914e-08
HTRA3	76.2449	2.57505	0.409683	6.28547	3.2686e-10	1.10914e-08
KIF14	398.452	-1.10544	0.175898	-6.28456	3.28775e-10	1.11331e-08
EXO1	336.354	-1.19252	0.19045	-6.26156	3.81151e-10	1.27737e-08
HJURP	473.763	-1.06715	0.170669	-6.25276	4.03263e-10	1.34042e-08
RTTN	383.097	-1.09704	0.175918	-6.23607	4.48694e-10	1.48233e-08
HCFC2	289.432	-1.26505	0.204477	-6.18676	6.14143e-10	1.99247e-08
WDR76	202.676	-1.4286	0.232736	-6.13829	8.34137e-10	2.65647e-08
LTB	358.156	-1.27706	0.209094	-6.10757	1.01156e-09	3.17413e-08
CACNG4	294.059	1.24239	0.203711	6.09879	1.06874e-09	3.32782e-08
LINC00265	291.667	1.21548	0.200078	6.07504	1.23956e-09	3.83768e-08
B4GALNT2	279.133	1.23682	0.205026	6.03248	1.61458e-09	4.94227e-08
BRCA1	373.325	-1.03537	0.172043	-6.01807	1.76511e-09	5.38277e-08
DNAJC12	363.791	1.04632	0.174345	6.00143	1.95592e-09	5.93127e-08
ASPM	289.17	-1.15754	0.193993	-5.96688	2.41828e-09	7.2255e-08
SLC22A31	1578.69	2.01625	0.339322	5.94198	2.81593e-09	8.32184e-08
HSPH1	3450.8	1.38037	0.232599	5.93457	2.94623e-09	8.64403e-08
KIF2C	341.736	-1.07824	0.181827	-5.93004	3.02861e-09	8.82206e-08
NAT16	88.7492	2.15032	0.366068	5.87411	4.25125e-09	1.21655e-07
SLC29A3	234.552	1.30313	0.221927	5.8719	4.30817e-09	1.22851e-07
NAGS	304.727	1.10932	0.189849	5.84319	5.1212e-09	1.43765e-07
MFAP2	60.0221	2.59176	0.443849	5.83928	5.24263e-09	1.4692e-07
MMP16	119.031	1.77661	0.305693	5.81172	6.18332e-09	1.6977e-07
STRA6	427.289	-1.09341	0.188432	-5.80265	6.52758e-09	1.78318e-07
LOXL4	212.906	-1.31485	0.228726	-5.74859	8.99925e-09	2.36689e-07
SYT1	226.933	1.30726	0.227554	5.74485	9.20046e-09	2.4159e-07
AMH	529.097	-1.00756	0.175529	-5.74014	9.46005e-09	2.47607e-07
SCARF2	389.704	1.01083	0.176614	5.72341	1.04409e-08	2.70233e-07
KIFC1	316.788	-1.06167	0.186446	-5.69422	1.23935e-08	3.17736e-07
POLE2	280.683	-1.12281	0.197858	-5.67483	1.38826e-08	3.53126e-07
KIF24	192.14	-1.35576	0.238921	-5.67449	1.39105e-08	3.53284e-07
RP11-283G6.3	285.771	-1.14071	0.201236	-5.6685	1.44052e-08	3.65277e-07
HELLS	301.118	-1.10569	0.195147	-5.66591	1.46243e-08	3.70254e-07
CA9	236.952	-1.37768	0.243255	-5.66351	1.48312e-08	3.74908e-07
CIDECP1	239.929	-1.24531	0.220057	-5.65903	1.52229e-08	3.83024e-07
ADAMTS1	144.102	1.55869	0.276742	5.6323	1.77824e-08	4.43306e-07
ANK2	144.883	1.5785	0.281846	5.60056	2.13655e-08	5.26174e-07
NGF	154.277	1.53797	0.276208	5.56815	2.57464e-08	6.29297e-07
TCTN2	287.483	-1.12869	0.204452	-5.52056	3.37927e-08	8.15295e-07
GCNT3	75.9463	2.15591	0.39092	5.51497	3.4884e-08	8.38765e-07
BOC	277.21	1.10501	0.201349	5.48804	4.06409e-08	9.7001e-07
HKDC1	67.1807	2.23328	0.407348	5.48248	4.19415e-08	9.96661e-07
SYNE3	317.793	1.26331	0.230615	5.478	4.30167e-08	1.01627e-06
CCDC18	352.841	-1.00392	0.183812	-5.46165	4.71717e-08	1.10799e-06
SNCA	145.422	1.48156	0.271684	5.45323	4.94638e-08	1.15515e-06
BARD1	284.836	-1.15089	0.211365	-5.44504	5.17936e-08	1.20093e-06
DACT1	102.597	1.7869	0.329423	5.42435	5.81651e-08	1.33722e-06
RP11-342D14.1	88.3555	1.93485	0.356783	5.42304	5.85924e-08	1.34135e-06
MAB21L4	120.973	-1.62196	0.300147	-5.4039	6.52059e-08	1.48025e-06
FRAS1	350.145	1.05362	0.195113	5.40008	6.66124e-08	1.50587e-06
SUN3	110.651	1.65075	0.307721	5.36443	8.1207e-08	1.79584e-06
OLAH	126.347	1.53616	0.28706	5.35134	8.73063e-08	1.92287e-06
VNN3	118.185	-1.67522	0.313413	-5.34507	9.03807e-08	1.9852e-06
FOXM1	300.883	-1.0934	0.204832	-5.33805	9.39499e-08	2.05803e-06
SHH	138.964	1.4544	0.273842	5.31109	1.08969e-07	2.36158e-06
NDUFA4L2	98.0862	1.79839	0.338826	5.30773	1.11e-07	2.39151e-06
BEST1	75.1302	1.99675	0.378408	5.27672	1.3152e-07	2.79806e-06
IL1R2	241.664	1.11233	0.211416	5.26134	1.4301e-07	3.01489e-06
LINC02551	133.825	1.49272	0.284828	5.24078	1.59901e-07	3.31933e-06
PRKCG	265.475	1.27679	0.243774	5.23761	1.62669e-07	3.37248e-06
DSC2	278.547	1.0229	0.196163	5.21455	1.84267e-07	3.75323e-06
MDM1	261.131	-1.07982	0.207116	-5.21359	1.85223e-07	3.76327e-06
INHBE	61.7201	2.22718	0.427421	5.21074	1.88084e-07	3.81663e-06
CAPN8	139.68	-1.43146	0.27513	-5.20287	1.96234e-07	3.9573e-06
NKX2-8	62.732	2.19022	0.421474	5.19658	2.02987e-07	4.07905e-06
APOBEC3C	4147.02	-1.28057	0.248014	-5.16328	2.42665e-07	4.77516e-06
CENPK	245.202	-1.15272	0.223289	-5.16246	2.43732e-07	4.78456e-06
ATP1A2	54.3035	2.35766	0.457562	5.15266	2.56814e-07	5.0051e-06
ZNF365	153.373	1.33849	0.259798	5.15203	2.57681e-07	5.01597e-06
SLC36A1	253.334	1.09382	0.212513	5.14708	2.64575e-07	5.13175e-06
SLC22A17	267.853	1.05022	0.204075	5.14627	2.65717e-07	5.14775e-06
EHD3	191.138	1.23226	0.240066	5.13301	2.8514e-07	5.51746e-06
KLHL35	176.665	1.25738	0.245311	5.12567	2.96476e-07	5.70286e-06
IL6-AS1	214.804	1.13633	0.221922	5.12039	3.04898e-07	5.83724e-06
DNAJB1	11520	1.40839	0.275196	5.11776	3.09182e-07	5.90535e-06
FANCM	193.776	-1.19774	0.235619	-5.08339	3.7076e-07	6.95882e-06
MYH15	90.6347	1.73344	0.341296	5.079	3.79436e-07	7.10525e-06
HROB	363.671	-1.03219	0.203276	-5.0778	3.81835e-07	7.14194e-06
FGF21	47.2401	2.61474	0.516054	5.06679	4.04581e-07	7.5155e-06
SGTB	129.043	1.56481	0.309785	5.05128	4.38868e-07	8.0694e-06
ZNF519	283.69	-1.00278	0.199351	-5.03022	4.89907e-07	8.91708e-06
RP1-244F24.1	256.495	-1.09298	0.217387	-5.02783	4.96053e-07	9.00876e-06
MCM10	132.523	-1.40523	0.279517	-5.02736	4.97272e-07	9.02082e-06
KIF20B	207.615	-1.12584	0.224232	-5.0209	5.14301e-07	9.28828e-06
GPR132	193.55	1.17717	0.234539	5.01907	5.19221e-07	9.36672e-06
PLA2G7	145.68	1.35311	0.269778	5.01562	5.28621e-07	9.51519e-06
RP11-395N3.2	152.036	-1.4392	0.287119	-5.01255	5.37145e-07	9.64724e-06
RP11-102G14.1	103.636	-1.63125	0.325646	-5.00927	5.46378e-07	9.79144e-06
CDC42EP5	198.806	1.15058	0.229728	5.00847	5.48648e-07	9.82128e-06
PDGFRL	168.41	1.28774	0.257141	5.00791	5.5023e-07	9.83877e-06
CACNG7	52.8456	2.46131	0.495342	4.96891	6.7331e-07	1.1857e-05
SMIM15	142.016	1.35036	0.272362	4.95796	7.12373e-07	1.24773e-05
ACOXL-AS1	168.278	-1.25917	0.254155	-4.95434	7.25778e-07	1.26984e-05
RP1-27K12.2	39.8037	2.72081	0.550247	4.9447	7.626e-07	1.32287e-05
E2F8	140.453	-1.35221	0.273706	-4.94038	7.79704e-07	1.34966e-05
HMGN2P46	147.254	-1.30483	0.265858	-4.908	9.20095e-07	1.56435e-05
HSPA7	52.1886	2.37828	0.484754	4.90617	9.28722e-07	1.57737e-05
PARPBP	136.261	-1.34286	0.274162	-4.89807	9.67842e-07	1.63868e-05
CD70	95.3222	1.59898	0.329559	4.85189	1.22291e-06	2.02828e-05
CCDC33	88.4861	-1.67424	0.345132	-4.85102	1.22831e-06	2.03516e-05
FAM111B	154.35	-1.27224	0.262484	-4.8469	1.25406e-06	2.06939e-05
HES7	210.885	1.20519	0.249018	4.83976	1.29999e-06	2.13651e-05
FNDC4	260.897	1.11523	0.230725	4.83357	1.34104e-06	2.19068e-05
TP53I3	165.417	1.21666	0.251965	4.82868	1.37442e-06	2.23845e-05
CPED1	199.844	1.16306	0.240985	4.82626	1.39123e-06	2.26131e-05
TTLL10	210.696	-1.38008	0.286852	-4.81113	1.50082e-06	2.42008e-05
SLC6A14	214.121	-1.05942	0.220268	-4.8097	1.51159e-06	2.43502e-05
LMO2	114.685	1.47122	0.307438	4.78544	1.70616e-06	2.70292e-05
ARC	124.128	1.39595	0.292389	4.77428	1.80349e-06	2.83265e-05
ANGPT4	32.1973	3.13286	0.657106	4.76765	1.86385e-06	2.91859e-05
PRIM1	110.29	-1.49045	0.312855	-4.76402	1.89771e-06	2.95738e-05
SCNN1A	214.614	-1.09189	0.229632	-4.75498	1.98469e-06	3.08111e-05
PER3	230.674	-1.06295	0.223711	-4.75143	2.01986e-06	3.13271e-05
HSPA6	12228.1	1.79277	0.377364	4.75077	2.02644e-06	3.13991e-05
DDX11L2	166.279	-1.18662	0.251413	-4.71979	2.36094e-06	3.61343e-05
RP11-631N16.2	157.186	-1.22702	0.260706	-4.70654	2.5196e-06	3.8346e-05
LRRCC1	171.504	-1.1969	0.254578	-4.70152	2.58234e-06	3.91543e-05
RSKR	142.636	-1.29604	0.276275	-4.69113	2.71703e-06	4.08893e-05
KLHDC7B	265.782	1.04582	0.22318	4.686	2.78603e-06	4.17365e-05
VGF	154.11	1.2532	0.267629	4.6826	2.83261e-06	4.23174e-05
NETO1	144.406	1.25962	0.270524	4.65621	3.22081e-06	4.75487e-05
SRXN1	52.5509	2.14408	0.461676	4.64411	3.41537e-06	5.03752e-05
SUV39H1	190.869	-1.08821	0.23521	-4.62655	3.71813e-06	5.44946e-05
RPSAP52	158.51	-1.18685	0.25673	-4.62293	3.78356e-06	5.53538e-05
DNAJB6P1	83.7732	1.62446	0.352323	4.6107	4.01306e-06	5.84483e-05
RENBP	115.956	1.39308	0.302688	4.60235	4.17748e-06	6.05563e-05
GTSE1	214.798	-1.05101	0.228549	-4.59863	4.25276e-06	6.13348e-05
ADCY10P1	188.683	-1.08051	0.236415	-4.57038	4.86849e-06	6.92928e-05
SHANK1	160.956	1.18267	0.260322	4.54309	5.54367e-06	7.76114e-05
MMP3	28.8728	-3.01114	0.663455	-4.53858	5.66337e-06	7.89472e-05
METTL7B	106.94	1.41796	0.312919	4.5314	5.85935e-06	8.13304e-05
XKR9	136.17	1.24214	0.274502	4.52506	6.03773e-06	8.35923e-05
LBH	66.019	-1.80081	0.400759	-4.49349	7.00638e-06	9.55696e-05
SH2D2A	215.677	1.03578	0.23051	4.49343	7.00867e-06	9.55696e-05
FRY	183.528	1.07744	0.240198	4.48564	7.26954e-06	9.8548e-05
STRADA	207.449	-1.06912	0.238447	-4.48369	7.33641e-06	9.92889e-05
BOLA3	161.409	1.14958	0.256423	4.48313	7.35553e-06	9.94649e-05
MX2	1249.09	-1.32009	0.295422	-4.46851	7.87662e-06	0.000105145
MKX	72.9992	1.7268	0.386735	4.46508	8.00387e-06	0.000106548
RP11-874J12.4	54.493	2.10451	0.472343	4.45548	8.37066e-06	0.000110525
BLM	126.643	-1.35851	0.305731	-4.44349	8.85098e-06	0.000115874
RRAGD	138.932	1.24361	0.28091	4.42707	9.55234e-06	0.000123815
CTD-3065J16.12	57.6809	-2.07155	0.468923	-4.41769	9.97618e-06	0.000128538
ALOXE3	165.746	1.33936	0.303548	4.41234	1.02261e-05	0.000131292
LINC01564	37.8077	2.4552	0.559127	4.39113	1.12764e-05	0.000142525
GCOM1	203.385	-1.01571	0.231495	-4.38762	1.14598e-05	0.00014473
RAI2	104.494	1.41095	0.323623	4.35987	1.3014e-05	0.00016135
RP11-368I7.6	114.334	-1.32457	0.303886	-4.35875	1.30806e-05	0.000161929
STAM-AS1	132.19	-1.2302	0.282417	-4.35598	1.32474e-05	0.000163744
FEZ1	127.147	1.28426	0.295196	4.35053	1.35812e-05	0.000167742
AOC3	177.985	-1.1083	0.255289	-4.34135	1.4161e-05	0.000173978
HSPA5	116943	1.16772	0.268993	4.34106	1.41796e-05	0.000174075
F2RL2	19.6869	5.25028	1.2119	4.33228	1.4757e-05	0.000179966
EMC3-AS1	146.323	-1.1535	0.266311	-4.3314	1.48163e-05	0.000180392
CCNA1	159.656	1.11911	0.260686	4.29293	1.76331e-05	0.000210896
ZNF726	117.943	-1.28332	0.300673	-4.26817	1.97084e-05	0.00023267
HOPX	32.0887	2.59712	0.609781	4.2591	2.0525e-05	0.000241574
RP11-167J8.5	111.92	1.2902	0.303918	4.24524	2.18364e-05	0.000254794
SYTL5	57.4966	1.86432	0.442182	4.21618	2.48473e-05	0.000286838
TMEFF1	17.9446	4.49393	1.06846	4.20598	2.59952e-05	0.000297763
NEIL3	160.384	-1.11214	0.264534	-4.20415	2.62065e-05	0.000299762
DDX58	90.8399	-1.41678	0.337844	-4.1936	2.74564e-05	0.000313396
RPL13AP20	109.219	1.30711	0.311829	4.19174	2.76826e-05	0.000315757
HEY1	122.878	1.23251	0.294222	4.18907	2.80105e-05	0.000319272
FRMD6-AS1	124.5	-1.19749	0.286072	-4.18597	2.83955e-05	0.000322982
AGR2	1999.87	1.47538	0.353048	4.17899	2.92806e-05	0.000331657
ISLR2	98.1586	-1.41309	0.338433	-4.17539	2.97471e-05	0.000335807
MRPL12	131.669	1.18079	0.283013	4.17222	3.01648e-05	0.000339307
CRYAB	65.6507	1.7885	0.428687	4.17203	3.01894e-05	0.000339349
HRK	60.3387	1.73539	0.416383	4.16778	3.07577e-05	0.000344546
ANOS1	179.019	1.03523	0.248544	4.1652	3.11086e-05	0.00034728
RP11-203F10.1	83.5002	-1.45245	0.349354	-4.15754	3.2169e-05	0.000356668
RHOF	120.258	1.22681	0.295134	4.15681	3.22729e-05	0.000357576
IER5	5140.3	1.41255	0.340057	4.15386	3.26909e-05	0.000361713
SLFNL1-AS1	48.717	-1.94012	0.468914	-4.13748	3.51139e-05	0.000386419
TSPYL2	2761.31	1.04179	0.252109	4.13229	3.59161e-05	0.000393914
RP11-509I21.4	105.613	1.28027	0.310803	4.11922	3.80149e-05	0.000413861
DOP1A	155.865	-1.08691	0.265229	-4.09799	4.16749e-05	0.000449194
MAGEH1	111.896	1.25632	0.306796	4.09497	4.2222e-05	0.000453586
MMS22L	167.999	-1.07569	0.262997	-4.0901	4.31184e-05	0.0004623
KNL1	170.953	-1.08231	0.265146	-4.08193	4.46628e-05	0.000477598
ISLR	49.8245	-1.89267	0.465187	-4.06862	4.72921e-05	0.000498874
TRIM54	74.3395	1.52243	0.37419	4.0686	4.7297e-05	0.000498874
VLDLR	161.663	1.05168	0.259793	4.04814	5.16273e-05	0.000537916
TPSP2	59.2236	1.77907	0.440769	4.03628	5.43054e-05	0.000561859
RP3-329A5.8	47.4033	-1.89465	0.471125	-4.02153	5.78203e-05	0.000594066
STARD4-AS1	114.974	-1.24936	0.311458	-4.01132	6.03806e-05	0.000616087
NHLH1	44.4795	1.99875	0.498795	4.00717	6.14508e-05	0.000625045
CPEB3	113.813	1.22032	0.305008	4.00094	6.30921e-05	0.000640136
OR2S1P	36.3637	2.20384	0.551005	3.99966	6.34332e-05	0.000643196
RP13-631K18.3	159.031	1.05985	0.265325	3.99454	6.48193e-05	0.000655615
SLC1A7	56.1896	-1.76247	0.441934	-3.98809	6.66065e-05	0.000671185
NIPAL1	143.711	1.20187	0.301496	3.98637	6.70929e-05	0.00067525
GNG5	80.5114	1.46826	0.36851	3.98432	6.76731e-05	0.000680247
ABCA13	69.0753	1.5313	0.387023	3.95662	7.60163e-05	0.000751563
RP11-407G23.8	73.3046	-1.54601	0.390983	-3.95417	7.68021e-05	0.000757949
NIPAL4	77.0584	1.47757	0.374317	3.94738	7.90126e-05	0.000777875
SSC5D	112.153	-1.28028	0.324588	-3.94433	8.00243e-05	0.000786406
RNF125	33.1281	2.36548	0.599988	3.94255	8.06213e-05	0.000790838
GLI2	171.733	1.01311	0.257126	3.94015	8.14315e-05	0.000797823
GOLGA2P10	172.202	1.02038	0.259379	3.93395	8.35615e-05	0.000816231
ID4	36.6464	2.26629	0.576378	3.93196	8.42568e-05	0.000822528
RP3-388N13.3	55.9573	1.72558	0.439188	3.92903	8.52895e-05	0.000831947
MSS51	181.792	-1.02681	0.261724	-3.92327	8.73558e-05	0.000849719
UST	152.25	1.08587	0.27698	3.9204	8.84023e-05	0.000859384
ZNF738	123.218	-1.19962	0.306915	-3.90865	9.28142e-05	0.000894782
DNAJB4	744.856	1.29784	0.33238	3.90469	9.43461e-05	0.000906861
KIAA1755	151.001	1.05811	0.271259	3.90072	9.59076e-05	0.000919694
HYDIN	111.47	-1.16633	0.299445	-3.89498	9.82058e-05	0.000937309
AFAP1L2	40.2659	2.02594	0.521496	3.88486	0.000102388	0.000970386
MT-ATP8	86.9047	1.35865	0.350294	3.8786	0.000105057	0.000991638
AQP11	140.008	1.06861	0.275532	3.87837	0.00010516	0.00099203
FAM107A	32.5304	2.27731	0.587554	3.87591	0.000106227	0.000998388
MAPK8IP1	162.714	1.01042	0.260729	3.87538	0.000106459	0.000999064
HPCAL4	66.1478	1.51925	0.392351	3.87216	0.000107873	0.00101059
TGFBR3	71.3072	1.69275	0.438221	3.86279	0.000112101	0.00104718
DIPK2A	97.3411	1.28827	0.334386	3.85263	0.000116855	0.00108041
FBXO43	88.6582	-1.32411	0.344119	-3.84784	0.000119165	0.00109802
SYT11	47.4366	1.82124	0.473667	3.84497	0.000120567	0.00110717
CYP4F11	42.5099	1.92913	0.502249	3.84099	0.00012254	0.00112275
PLIN1	85.364	-1.3327	0.348647	-3.82249	0.00013211	0.00119628
HSPB8	90.7752	1.3069	0.341932	3.8221	0.000132319	0.00119653
ADAM22	112.706	1.15228	0.302057	3.81477	0.000136312	0.00122681
CD8A	58.4709	1.59025	0.417042	3.81317	0.000137194	0.00123406
CTC-573N18.1	17.6853	3.41644	0.896569	3.81057	0.000138645	0.00124574
GLT8D2	93.3709	1.2651	0.33231	3.80699	0.000140666	0.00126041
PRKG1	124.596	1.14726	0.301759	3.80191	0.000143584	0.00128231
MIR137HG	32.7031	2.22243	0.585921	3.79306	0.000148804	0.00132456
EDN2	38.311	2.00977	0.530032	3.79179	0.000149566	0.00133062
NDUFV2P1	89.1329	1.27351	0.336052	3.78962	0.000150877	0.00134082
SLC1A1	138.527	1.02851	0.271429	3.78924	0.000151108	0.00134214
RINL	90.3318	1.26433	0.334527	3.77946	0.000157167	0.00138518
C15orf54	110.715	1.29914	0.344418	3.772	0.000161943	0.0014167
ARHGAP28	80.2941	1.34519	0.356989	3.76815	0.000164461	0.00143409
AC002064.4	18.0945	-3.25114	0.864362	-3.76132	0.000169021	0.00146756
PTHLH	90.1267	1.25427	0.333643	3.75932	0.000170378	0.00147656
NRK	40.5206	-1.94906	0.519057	-3.755	0.000173341	0.00149707
RP1	110.325	1.17311	0.313616	3.74059	0.00018359	0.00157298
LINC02246	106.197	-1.14383	0.308613	-3.70635	0.00021027	0.00177544
LINC02331	50.6919	1.75609	0.475022	3.69687	0.000218273	0.00182971
SAMD14	148.858	1.04152	0.281895	3.69471	0.000220136	0.0018424
CASKIN1	134.715	1.08377	0.293684	3.69026	0.000224026	0.00186543
ADAMTS16	145.332	1.04353	0.28304	3.68685	0.00022705	0.00188771
ASB9	100.551	1.15617	0.314802	3.67268	0.000240021	0.00198036
LINC02869	62.7864	1.51069	0.412486	3.66239	0.000249875	0.00204659
RP11-1275H24.3	40.7813	1.88735	0.515814	3.65898	0.000253219	0.00207033
RP4-809E13.5	82.724	-1.30787	0.35785	-3.65481	0.000257375	0.00209903
LRRC2	68.1324	1.50419	0.411807	3.65266	0.000259535	0.00211096
ELAPOR1	45.9248	1.87211	0.515553	3.63127	0.000282031	0.00226276
NOVA2	112.887	1.11527	0.307504	3.62684	0.000286912	0.00229501
FGF19	118.994	1.0506	0.289918	3.62377	0.000290342	0.00231561
FAM72D	80.506	-1.29815	0.358633	-3.61971	0.000294934	0.00234878
GPR63	134.494	1.0576	0.292529	3.61536	0.000299932	0.00238158
HECW1	91.2458	1.20364	0.334527	3.59805	0.000320607	0.00251625
DMGDH	51.5161	1.59851	0.444561	3.59571	0.000323511	0.00253781
ZBP1	69.2296	-1.36426	0.379841	-3.59166	0.000328577	0.00256941
RP11-285F7.2	112.648	-1.07263	0.299072	-3.58652	0.000335123	0.00261251
BRINP2	99.11	-1.14355	0.31915	-3.5831	0.000339542	0.00264063
FANCB	94.6738	-1.18582	0.331329	-3.57898	0.000344938	0.00268003
REL	89.6738	-1.19683	0.334886	-3.57386	0.000351757	0.00272649
SCN4B	70.7007	1.38021	0.387292	3.56374	0.000365609	0.00282041
LTF	29.3714	2.17462	0.610725	3.56072	0.00036984	0.00285035
C5AR1	65.4908	1.40581	0.395407	3.55534	0.00037749	0.00289831
C20orf144	76.1786	1.31071	0.369795	3.54444	0.000393454	0.0030095
RP11-149I23.3	41.6397	1.75495	0.496653	3.53355	0.000410013	0.00311343
RP11-631N16.4	78.4873	-1.29096	0.365496	-3.53207	0.000412318	0.00312294
SGMS2	123.909	1.0339	0.293427	3.52354	0.00042583	0.0032117
TBX2	96.197	1.21016	0.343522	3.5228	0.000427011	0.00321773
LINC02004	136.28	1.05116	0.298781	3.51817	0.000434529	0.00326077
MYO7A	94.1543	1.13988	0.324559	3.51209	0.000444591	0.00332381
LINC00623	128.541	1.02667	0.292839	3.50591	0.000455057	0.00338823
CCRL2	102.397	1.16998	0.33431	3.49967	0.000465832	0.00346211
PPP1R3G	81.8233	1.24203	0.355742	3.49138	0.000480537	0.00355515
IGFBP5	109.482	-1.05349	0.301882	-3.48973	0.000483511	0.00357389
SH2D3C	73.2927	1.28529	0.369337	3.48	0.000501421	0.00368449
CDH17	22.7753	-2.48796	0.714966	-3.47984	0.000501721	0.00368503
NEB	78.0631	-1.2951	0.372615	-3.47571	0.000509499	0.00373709
NCR3LG1	72.275	1.32703	0.381891	3.4749	0.000511045	0.00374336
RAB33A	65.3664	1.40668	0.407145	3.45499	0.000550318	0.00397727
KCNAB3	121.408	-1.00933	0.29255	-3.45012	0.000560333	0.00403708
DYNC1I1	29.2062	2.12653	0.616707	3.4482	0.000564343	0.00405878
BGN	89.3716	1.15112	0.334016	3.44631	0.000568294	0.00407997
FIBCD1	89.8527	1.18892	0.345105	3.4451	0.000570846	0.00409256
SMPD3	106.952	-1.06303	0.309811	-3.43122	0.000600884	0.00428179
TBX19	93.6461	-1.12583	0.328294	-3.42934	0.000605046	0.00430579
VLDLR-AS1	21.9574	2.72032	0.795706	3.41875	0.000629106	0.0044478
LINC01111	32.7503	2.05528	0.603475	3.40574	0.000659862	0.00464705
HSF2BP	71.1064	1.27239	0.373914	3.40291	0.000666733	0.00468529
TNFSF18	45.6705	1.79615	0.528424	3.39908	0.000676138	0.00473704
C2CD4C	71.1605	1.2883	0.379268	3.3968	0.000681783	0.00477171
ORC1	68.1233	-1.30706	0.384811	-3.39664	0.000682199	0.00477171
RP13-726E6.5	65.1867	1.34518	0.398038	3.37954	0.000726082	0.00503517
BTG4	25.9607	2.26894	0.671632	3.37824	0.000729502	0.00505239
RBM20	60.3081	1.41634	0.419465	3.37654	0.00073405	0.00507712
HECW2	23.6259	2.28746	0.681279	3.35759	0.000786246	0.00539909
ERVE-1	94.7164	1.094	0.328039	3.33496	0.000853107	0.00578973
AC010976.2	88.6652	-1.11691	0.335162	-3.33246	0.000860809	0.00583226
PCLAF	97.79	-1.08037	0.324709	-3.32718	0.000877291	0.00592171
OR2W3	83.3121	1.19767	0.36013	3.32566	0.00088211	0.0059493
NTS	26.251	-2.30164	0.693632	-3.31824	0.000905868	0.00609941
RP11-2L8.1	21.3313	-2.38087	0.71846	-3.31385	0.000920211	0.00617552
LINC00920	55.5734	1.42885	0.431598	3.31061	0.000930919	0.00623844
APOBEC3F	81.7922	-1.17755	0.357228	-3.29636	0.000979471	0.00651138
ACOX2	47.8483	-1.49658	0.456633	-3.27741	0.00104763	0.0068884
ELMOD1	15.6464	3.02854	0.924272	3.27668	0.00105037	0.00690084
KRT18P8	53.8054	1.44518	0.443723	3.25694	0.00112621	0.00730463
TPRG1	70.7094	-1.23036	0.378101	-3.25405	0.00113773	0.00735293
TMIE	90.9997	1.16455	0.359116	3.24283	0.00118349	0.00760637
SPNS3	21.2334	2.50273	0.772435	3.24005	0.00119508	0.00766565
FLJ42969	93.7033	1.07387	0.332426	3.23042	0.00123608	0.00786658
RP1-239B22.5	42.5036	1.67817	0.519897	3.22789	0.00124709	0.00792114
RP11-416N2.4	19.429	2.44984	0.760202	3.22262	0.00127024	0.00804614
DIO3	54.9487	-1.45171	0.451232	-3.21721	0.00129443	0.00817508
FAM169A	78.4092	1.14628	0.356301	3.21717	0.00129461	0.00817508
METTL7A	69.0986	-1.23851	0.385862	-3.20971	0.00132867	0.00835446
RP11-247C2.2	35.4225	-1.75073	0.545475	-3.20956	0.0013294	0.00835577
C12orf57	50.4273	1.52478	0.47635	3.20097	0.00136964	0.00855907
ACTRT3	53.6686	1.40116	0.438323	3.19665	0.00139036	0.00867186
TMEM200C	18.5932	2.55041	0.801514	3.18199	0.00146268	0.00907421
CHRNA5	79.9688	1.14714	0.360561	3.18153	0.00146498	0.00908499
CLGN	692.699	1.27655	0.401966	3.17576	0.00149442	0.00925345
CYP4V2	65.7846	1.24773	0.39296	3.17521	0.0014973	0.00926773
LINC01828	90.4305	1.05803	0.33417	3.16615	0.00154469	0.00951398
LINC02542	61.8119	1.26556	0.401629	3.15108	0.0016267	0.00994372
ZFHX4-AS1	42.3948	1.54927	0.49285	3.14349	0.00166944	0.0101535
ABCC9	37.1756	1.64457	0.525463	3.12976	0.00174951	0.0105399
CD44-AS1	92.8209	-1.0201	0.326354	-3.12576	0.00177347	0.0106566
RP11-536L3.4	24.3641	-2.16696	0.694044	-3.12222	0.00179492	0.0107537
LINC02293	72.7459	-1.15419	0.370005	-3.1194	0.00181219	0.0108382
SCAT2	50.0807	-1.44235	0.462778	-3.11672	0.00182878	0.0109163
LINC01291	89.6759	1.07453	0.344782	3.11656	0.00182975	0.0109181
LRRC71	71.625	-1.14325	0.369595	-3.09324	0.00197982	0.0116636
TRBC2	83.3533	1.0735	0.347628	3.08807	0.00201463	0.0118429
SERP2	21.5135	2.27331	0.737664	3.08177	0.00205771	0.0120483
KLK14	88.5256	-1.06147	0.344471	-3.08145	0.00205997	0.0120528
ABCB6	78.6362	1.13021	0.367034	3.07932	0.00207477	0.0121176
FPGT-TNNI3K	26.3061	-2.04036	0.66312	-3.0769	0.00209166	0.0121856
ZNF137P	53.7924	-1.34111	0.436511	-3.07235	0.00212381	0.0123508
PRSS35	49.5109	1.41159	0.459806	3.06998	0.00214075	0.0124359
PAQR4	55.3834	-1.33347	0.435842	-3.05954	0.00221681	0.0127909
ATP6V0D2	18.8156	2.36214	0.776683	3.04132	0.00235546	0.0133866
FAM110B	63.4162	1.20238	0.395464	3.04044	0.00236232	0.0134209
RELN	25.5621	1.99559	0.657377	3.03569	0.00239982	0.0136054
RP11-373E16.4	33.6351	1.80177	0.594665	3.02988	0.00244647	0.0138217
RUBCNL	26.761	1.91796	0.63368	3.02671	0.00247234	0.0139291
TMEM139	77.5647	1.09979	0.364463	3.01756	0.00254814	0.0142819
RP11-810P12.7	96.8401	1.01418	0.336283	3.01585	0.00256259	0.0143431
ADORA1	48.8083	-1.38418	0.460486	-3.00592	0.00264781	0.0147388
MFHAS1	79.029	-1.06638	0.355255	-3.00174	0.00268444	0.0149107
RP11-356O9.2	38.4132	-1.5442	0.516729	-2.98841	0.00280433	0.0154409
HGFAC	31.2572	-1.698	0.568422	-2.98722	0.00281526	0.0154906
SSTR2	38.2908	-1.63222	0.546907	-2.98447	0.00284074	0.0155991
AC074141.3	83.4678	-1.11944	0.375104	-2.98436	0.00284171	0.0155992
GRIK5	33.3589	1.68935	0.566179	2.98377	0.00284723	0.0156242
MSLNL	29.4887	-1.78848	0.601314	-2.97428	0.00293673	0.015986
DUSP5-DT	24.4554	1.93851	0.6525	2.97089	0.00296936	0.0161277
ARHGAP5-AS1	29.6603	1.79097	0.604435	2.96305	0.00304607	0.0164433
SENCR	61.1209	1.18554	0.400586	2.95952	0.00308114	0.0165947
RP11-427L15.2	54.7655	-1.30855	0.443015	-2.95374	0.00313952	0.016836
PTGER1	62.9682	1.1799	0.400575	2.94551	0.00322422	0.0172389
CCR5AS	63.9232	1.15946	0.394054	2.94239	0.00325688	0.0173793
CRACD	56.5836	1.23483	0.420493	2.93662	0.00331815	0.0176367
ALKAL2	71.4735	1.08666	0.370415	2.93363	0.00335028	0.0177553
PSMA2	48.2283	-1.36962	0.470193	-2.91289	0.00358103	0.018764
RP11-395N3.1	26.64	-1.89012	0.65048	-2.90573	0.00366397	0.0191246
CTD-2318O12.1	39.8175	-1.47437	0.507491	-2.90521	0.00367003	0.0191501
KCTD4	26.8922	1.89408	0.654046	2.89595	0.00378017	0.0196189
PLEKHG4B	35.124	1.56429	0.540168	2.89593	0.00378039	0.0196189
JAKMIP3	87.9572	1.02969	0.355826	2.89379	0.00380617	0.0197338
ELFN1	48.5562	1.31171	0.453455	2.89269	0.00381956	0.0197961
EDNRA	64.6211	1.13314	0.392033	2.89042	0.00384727	0.0199151
KDR	31.8891	1.66166	0.575108	2.88929	0.0038611	0.0199804
ACTN1-AS1	47.1244	-1.31581	0.457031	-2.87905	0.00398877	0.0204437
APOBEC3G	414.746	-1.54414	0.536995	-2.87553	0.00403351	0.0206295
RP11-96B5.3	36.5472	1.49912	0.521961	2.8721	0.00407753	0.0208088
ALOX12B	20.2351	2.10855	0.734982	2.86885	0.00411972	0.0209912
HLA-DQB1	44.676	1.38474	0.483559	2.86365	0.00418793	0.0212854
SLC40A1	46.8565	1.34677	0.471586	2.85583	0.00429246	0.0217554
RAB7B	71.9492	1.05751	0.370658	2.85307	0.00432993	0.0219044
FAM189A2	64.5102	1.11443	0.391521	2.84641	0.00442153	0.0223053
MBNL3	75.7154	-1.08015	0.379701	-2.84474	0.00444478	0.0224017
SMARCE1	74.0501	-1.05759	0.372409	-2.83985	0.0045135	0.0226777
TRIL	32.4623	1.61367	0.568633	2.83781	0.00454242	0.0227878
SAMD5	46.9202	1.3254	0.468849	2.82691	0.00469988	0.0234691
P2RY1	49.5978	1.29548	0.458821	2.82351	0.00475012	0.0236909
TTLL10-AS1	60.1309	-1.41721	0.502922	-2.81796	0.00483305	0.0240381
LINC01293	67.577	1.12406	0.402489	2.79278	0.00522572	0.0256535
PHBP9	49.6072	-1.27393	0.456264	-2.79208	0.00523706	0.0256937
OLFML2B	62.8404	1.22447	0.43881	2.79044	0.00526364	0.0257774
TSHZ1	77.6974	1.08776	0.390347	2.78665	0.00532563	0.0259948
SLC28A3	66.5622	-1.08281	0.388916	-2.78418	0.00536626	0.026146
ANKRD61	44.5184	-1.3176	0.473855	-2.78061	0.00542572	0.0264041
PDF	62.2799	1.11844	0.402654	2.77768	0.00547488	0.0265876
LINC02873	44.7159	-1.32765	0.478282	-2.77587	0.00550538	0.0267038
PIK3C2G	23.5152	1.86603	0.673906	2.76898	0.00562329	0.0271891
SEMA3D	65.9635	1.11436	0.402438	2.76902	0.0056225	0.0271891
C7orf57	39.4018	1.42491	0.514929	2.76719	0.00565421	0.0273035
IL17D	56.8257	1.18515	0.428849	2.76356	0.00571749	0.0275273
RP11-705O3.3	68.8194	-1.19194	0.431796	-2.76042	0.00577273	0.0277439
DUSP2	53.901	1.19085	0.431786	2.75797	0.00581621	0.0279078
NXPH3	19.9583	1.98883	0.722308	2.75344	0.00589723	0.0282587
RP11-147I3.1	59.0593	-1.11438	0.406379	-2.74222	0.00610263	0.0290898
AMHR2	22.3578	1.91159	0.701277	2.72587	0.00641327	0.0303154
OTUB2	57.9439	1.15708	0.424624	2.72496	0.00643097	0.0303598
PLD5P1	43.063	-1.37485	0.505085	-2.72202	0.00648846	0.0305514
RP11-156K13.1	41.6424	1.3433	0.494603	2.71592	0.00660914	0.0310208
FER1L5	52.022	-1.24946	0.460463	-2.71348	0.00665812	0.0312236
GLI1	21.9325	1.9873	0.732519	2.71297	0.00666823	0.031235
STK32B	23.777	1.79064	0.66166	2.70629	0.006804	0.0317247
ERICH2	42.6236	1.31667	0.486561	2.70608	0.00680821	0.0317352
TNFRSF13C	44.6429	-1.36004	0.503858	-2.69925	0.00694955	0.0322553
TAGLN3	59.0353	1.10419	0.409765	2.6947	0.00704514	0.0325873
AC068831.18	40.9061	-1.49058	0.553575	-2.69264	0.00708892	0.0327618
TAS2R5	23.816	-1.85933	0.690655	-2.69212	0.00709994	0.0328034
ZNF710-AS1	58.4888	-1.09672	0.40757	-2.69087	0.00712651	0.0328888
VIM-AS1	53.4892	1.18262	0.440554	2.6844	0.00726602	0.0333904
MUC4	15.8651	2.30068	0.861519	2.67049	0.0075741	0.0345328
CTB-147C22.9	57.6489	1.16591	0.437366	2.66575	0.0076817	0.0349254
LINC01363	16.2633	-2.18155	0.81876	-2.66445	0.00771132	0.0350209
RP4-740C4.7	36.4022	-1.38679	0.520566	-2.664	0.00772171	0.0350583
RP11-357H14.17	21.0578	1.91039	0.71733	2.66319	0.00774026	0.0351229
NUPR1	51.0422	1.17062	0.439625	2.66278	0.00774984	0.0351566
DLEU2	40.8369	-1.3034	0.489728	-2.66147	0.00778004	0.0352735
NRAD1	22.9034	-2.05417	0.774274	-2.65303	0.00797736	0.0360278
CTC-529I10.2	42.0129	-1.27931	0.482822	-2.64966	0.00805728	0.036298
SULT1B1	61.2611	1.08256	0.408906	2.64745	0.0081102	0.0364757
LPO	19.3681	1.96354	0.74232	2.64514	0.00816567	0.0366744
RP11-395L14.18	58.0285	-1.0797	0.408584	-2.64254	0.00822867	0.0368962
TM4SF19	40.3081	1.30554	0.494535	2.63994	0.00829214	0.0371399
MAPT	69.6527	1.03824	0.393438	2.6389	0.00831764	0.0372233
DUSP15	66.7063	1.01338	0.384069	2.63853	0.00832657	0.0372427
MNS1	46.32	-1.25166	0.475254	-2.63366	0.00844689	0.0376875
NTNG2	40.686	1.30202	0.49455	2.63274	0.00846981	0.037738
GPR85	28.2192	1.74336	0.663375	2.62801	0.00858858	0.0381835
COLQ	27.3587	-1.64031	0.624994	-2.62452	0.00867712	0.038503
RP11-44N22.3	54.5748	1.14411	0.436138	2.62328	0.00870875	0.0386016
RP1-153G14.4	51.2936	-1.14597	0.437012	-2.6223	0.0087339	0.038692
ACTL10	40.4127	1.29812	0.496288	2.61566	0.00890554	0.0393344
CD247	25.4683	1.73892	0.665853	2.61157	0.00901287	0.0397423
ITGB2-AS1	62.641	-1.07715	0.412467	-2.61148	0.009015	0.0397423
CYBRD1	42.3472	1.27936	0.491217	2.60448	0.00920136	0.0404323
MIR3685	25.6159	-1.73478	0.666138	-2.60424	0.00920794	0.0404393
LAMA1	46.2487	1.18797	0.458437	2.59135	0.00956003	0.0415593
MUC5AC	27.4077	-1.57787	0.611005	-2.58242	0.00981095	0.0424605
ZNF114	20.0194	1.86285	0.721384	2.58233	0.00981369	0.0424605
ZNF790-AS1	45.0291	-1.27032	0.492656	-2.57851	0.00992288	0.0428498
FLNC-AS1	35.4809	1.39339	0.540715	2.57694	0.009968	0.0429882
RP11-663N22.1	35.502	1.40571	0.546724	2.57116	0.0101359	0.0434693
AANAT	29.0987	-1.49971	0.583409	-2.5706	0.0101522	0.0435165
DUOX2	28.8028	1.61864	0.631559	2.56292	0.0103796	0.0442462
C15orf65	54.9725	1.1068	0.432759	2.55755	0.0105413	0.044759
PLXDC1	46.5871	-1.18663	0.464203	-2.55628	0.0105799	0.0448879
RP11-415J8.3	36.7538	-1.35805	0.53205	-2.55249	0.0106955	0.0453074
LHB	61.8179	1.03581	0.406259	2.54963	0.0107836	0.0456095
HEXD-IT1	36.1375	-1.32419	0.52076	-2.5428	0.0109967	0.0463539
LRRN2	25.1028	1.68929	0.665725	2.53751	0.0111644	0.0469025
AF127936.9	42.5357	-1.2244	0.48299	-2.53503	0.0112437	0.0471871
HHIP-AS1	25.8817	1.70755	0.674284	2.53239	0.0113289	0.0474588
RP11-196G18.3	59.4812	1.05474	0.417936	2.52369	0.011613	0.0483868
VWA3A	33.151	-1.40489	0.558725	-2.51447	0.0119212	0.0494179
TRPM6	18.0604	1.90257	0.757318	2.51225	0.0119965	0.0496918
TXNDC5	58.6293	1.01911	0.40595	2.51043	0.0120584	0.0498774
